# Supplementary material
Source: Frontiers journal article supplement (https://www.frontiersin.org/articles/137144)
Supplement: Presentation_1.PDF [file Presentation_1.PDF]

# **Supplementary Material for Integrative analysis of functional genomic annotations and sequencing data to identify rare causal variants**

Marinela Capanu<sup>1,3</sup> and Iuliana Ionita-Laza<sup>2,3,\*</sup>

<sup>1</sup> Memorial Sloan-Kettering Cancer Center, New York, NY 10021

<sup>2</sup> Department of Biostatistics, Columbia University, New York, NY 10032

<sup>3</sup> Equal contribution

\* Corresponding author: [ii2135@columbia.edu](mailto:ii2135@columbia.edu)

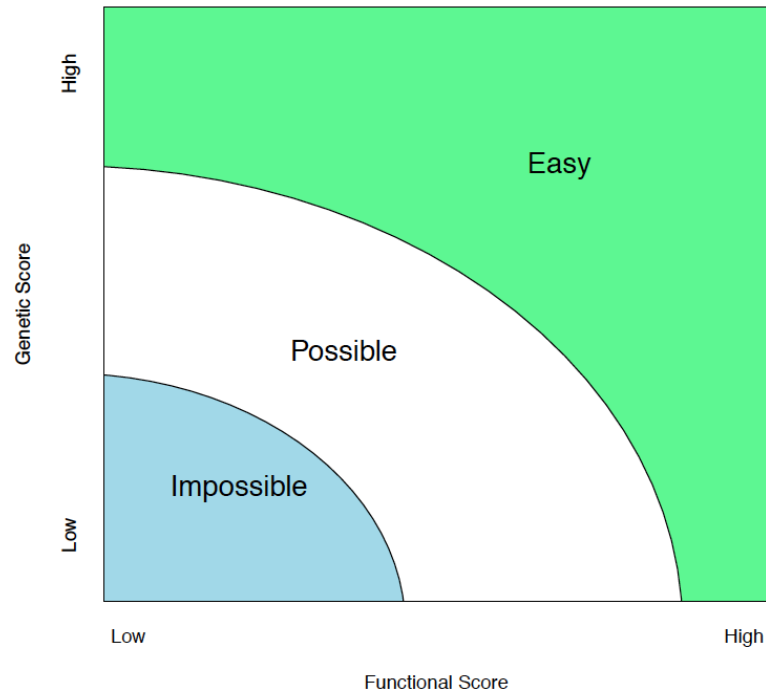

Supplementary Figure 1: The ability to classify a true causal variant as such, as a function of the genetic and functional scores for a variant.
